# Supplementary material
Source: bioRxiv or medRxiv preprint supplement (https://www.biorxiv.org/highwire/filestream/43255/field_highwire_adjunct_files/0/126375-1.pdf)
Supplement: Supplementary file [file 126375-1.pdf]

## **Supplementary File**

**Title:** Temporal changes in the nasal microbiota and host antimicrobial responses to intranasal mupirocin decolonisation: Observations in healthy staphylococcal carriers

### **Authors:**

Su-Hsun Liu, Yi-Ching Tang, Yi-Hsiung Lin, Kuan-Fu Chen, Chih-Jung Chen, Yhu-Chering Huang, Leslie Y Chen

### **Content:**

Section 1. Details of RT-qPCR procedure for selected antimicrobial peptide genes

Section 2. Supplementary Tables S1-S2

Section 3. Supplementary Figures S1-S3

## **SECTION 1. QA procedures for RT-qPCR of selected antimicrobial peptide genes**

Samples from the same subject were always measured in the same batch; any two out of four subjects were randomly paired in a batch regardless of pre-treatment

Staphylococcal carriage status. For each target gene, we repeated the experiment for at least twice, each time using triplicate subsamples. We applied the  $\Delta\Delta C_t$  method [1] to estimate transcript levels comparing each post-treatment (T1 to T5) to the corresponding pre-treatment (T0) sample.

## SECTION 2. Supplementary Tables

**Table S1.** Characteristics and nasal carriage status of participants

| Case no. | Age (years) | BMI (Kg/m <sup>2</sup> ) | Time at work (years) | Rhinitis history | Carriage status at FU (% FU visits) | Carriage status before and after mupirocin use <sup>a</sup> |                 |    |    |    |    |
|----------|-------------|--------------------------|----------------------|------------------|-------------------------------------|-------------------------------------------------------------|-----------------|----|----|----|----|
|          |             |                          |                      |                  |                                     | T0                                                          | T1              | T2 | T3 | T4 | T5 |
|          |             |                          |                      |                  |                                     | Before treatment                                            | After treatment |    |    |    |    |
| <1week   | <1week      | 3 weeks                  | 5 weeks              | 9 weeks          | 13 weeks                            |                                                             |                 |    |    |    |    |
| A        | 42          | 18                       | 18                   | Y                | 66.7%                               | N                                                           | N               | N  | N  | N  | N  |
| B        | 39          | 23.4                     | 1                    | N                | 100%                                | Y                                                           | N               | Y  | N  | N  | N  |
| C        | 22          | 23.3                     | 1                    | N                | 86.4%                               | Y                                                           | N               | N  | Y  | Y  | N  |
| D        | 30          | 22.8                     | 1.5                  | Y                | 71.7%                               | Y <sup>b</sup>                                              | N               | N  | N  | N  | N  |

Abbreviations: BMI, body mass index; BL, baseline; FU, follow-up; IQR, interquartile range; MRSA, methicillin-resistant *Staphylococcus aureus*

a. Interval *before the beginning* and *after the end* of a five-day course of topical mupirocin use twice daily, expressed as median (IQR)

b. Methicillin-resistant strain (MRSA)

**Table S2.** Sample sequence metrics

| Characteristics        | No. subjects | No. samples | Sequence  |                  |                |                 | Unique OTU <sup>a</sup> |         |                  |
|------------------------|--------------|-------------|-----------|------------------|----------------|-----------------|-------------------------|---------|------------------|
|                        |              |             | Total N   | Per subject Mean | Per subject SD | Per sample Mean | Per sample SD           | Total N | Singletons n (%) |
| Total                  | 4            | 24          | 1,958,527 | 489,631.8        | 40,213.6       | 81,605          | 19,454                  | 341     | 27 (7.9%)        |
| Timing                 |              |             |           |                  |                |                 |                         |         |                  |
| pre-treatment          | 4            | 4           | 327,964   | 81,991.0         | 11,900.0       | 81,991          | 11,900                  | 254     | 15 (5.9%)        |
| Post-treatment         | 4            | 20          | 1,630,563 | 407,640.8        | 45,719.8       | 81,528          | 20,874                  | 298     | 12 (4.0%)        |
| Pre-treatment carriage |              |             |           |                  |                |                 |                         |         |                  |
| Negative               | 1            | 6           | 497,381   | 497,381          | -              | 82,897          | 19,231                  | 239     | 8 (3.3%)         |
| Positive               | 3            | 18          | 1,461,146 | 487,048.7        | 48,843.3       | 81,175          | 20,061                  | 310     | 19 (6.1%)        |

Abbreviations: OTU, operational taxonomy unit; SL, similarity level; SD ,standard deviation

a. Including uncharacterised taxa with unknown or temporary taxonomic names

**SESECTION 3. Supplementary Figures**

**Figure S1.** Relative abundance of dominant genera and culture results for *S. aureus* (\*) in individual participant at each sampling time (T0-T5). (UC=unclassified)

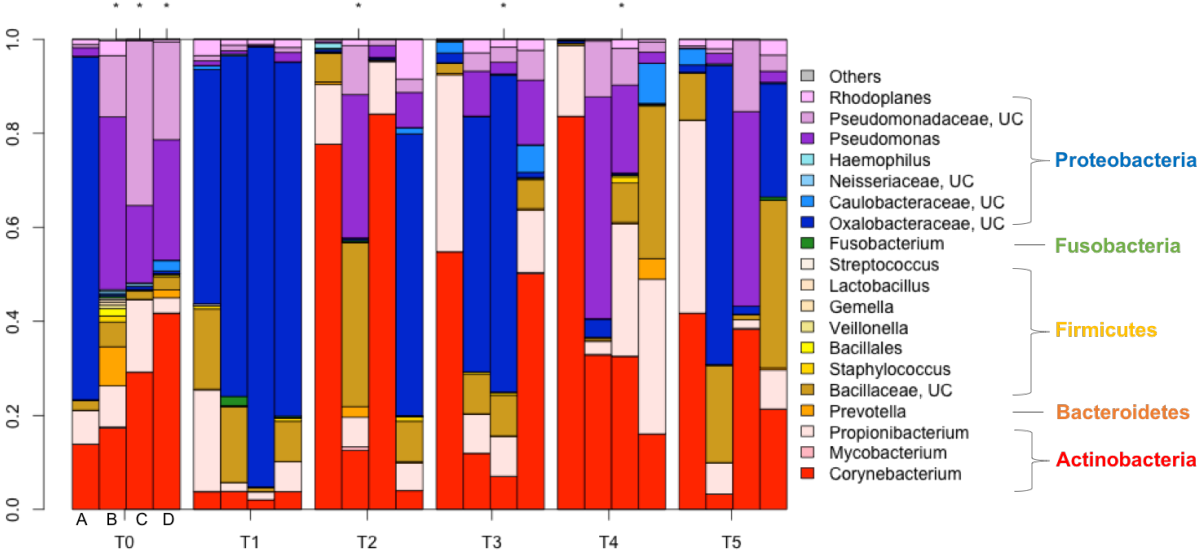

**Figure S2.** Alpha diversity measures at each sampling time. (pre\_carrier=initial carriage status)

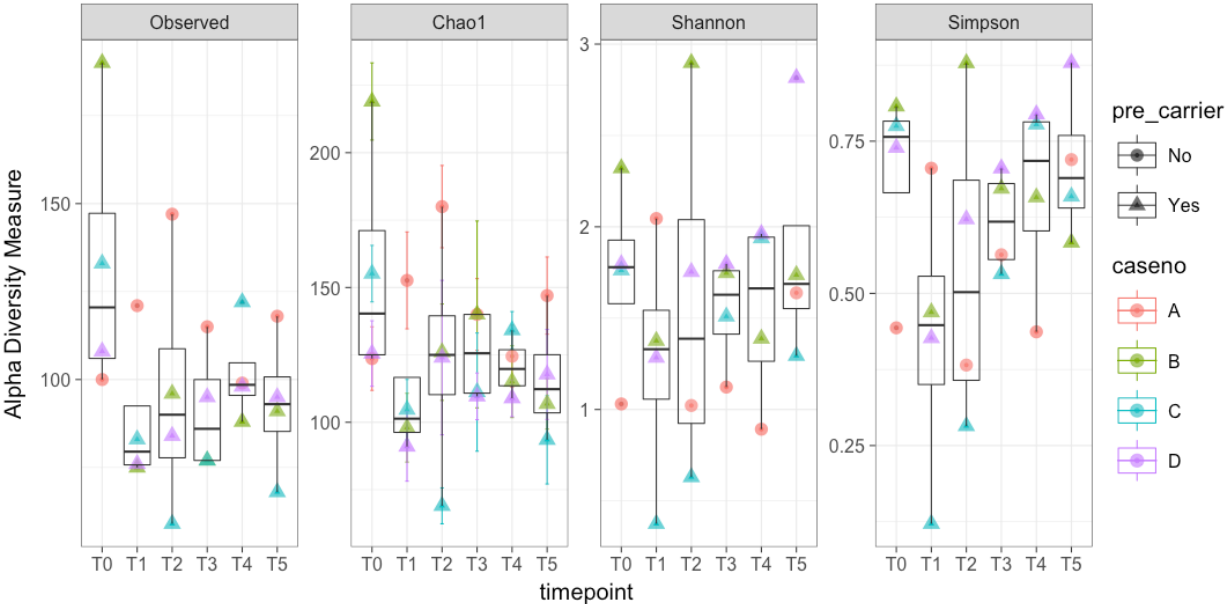

**Figure S3.** Results of univariate differential abundance analysis showing specific OTUs that were substantially enriched (red) or depleted (blue) in samples with higher expression levels of HNP1 (a) or of HBD3 (b) than those with lower levels (NA=unclassified).

(a) High versus low expression levels of HNP1

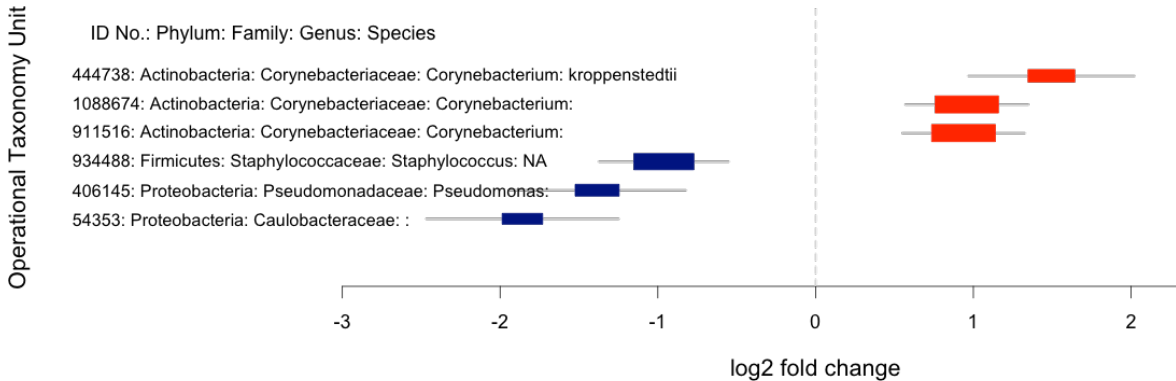

(b) High versus low expression levels of HBD3

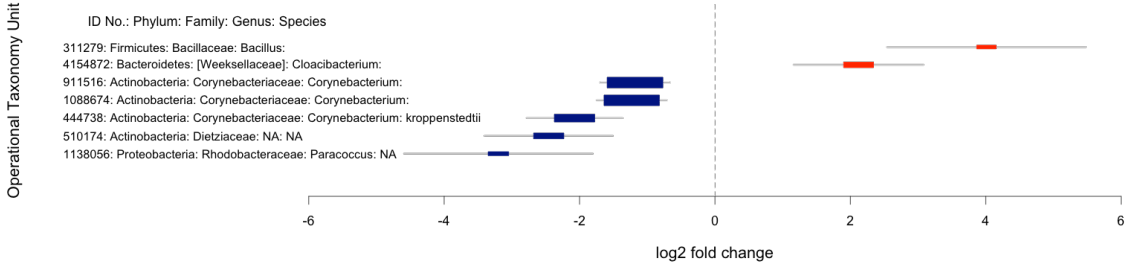

## REFERENCES

1. Bustin SA, Benes V, Garson JA, Hellemans J, Huggett J, Kubista M, Mueller R, Nolan T, Pfaffl MW, Shipley GL *et al*: **The MIQE guidelines: minimum information for publication of quantitative real-time PCR experiments.** *Clin Chem* 2009, **55**(4):611-622.
